# Supplementary material for: Structure of the FeFe-cofactor of the iron-only nitrogenase and possible mechanism for dinitrogen reduction
Source: Royal Society of Chemistry journal article supplement (doi:10.1039/b310850c), 2004-01-01
Supplement: b310850c.doc [file b310850c.doc]

Supplementary Material for PCCP

This journal is © The Owner Societies 2004

Supporting Information: Structure and Mechanism of the Fe-only nitrogenase

Berit Hinnemann and Jens K. Nørskov

# Optimized atomic coordinates for the FeFeco and FeMoco structures

FeMoco with central N ligand and 3H (Fig. 3b)

| FE1 | -1.477 | -0.664 | -5.082 |
| --- | --- | --- | --- |
| FE2 | 0.035 | 1.432 | -5.015 |
| FE3 | 1.118 | -0.901 | -4.958 |
| FE4 | 1.229 | -0.862 | -2.334 |
| FE5 | -1.371 | -0.677 | -2.278 |
| FE6 | -0.011 | 1.562 | -2.348 |
| MO1 | -0.004 | 0.022 | -0.018 |
| FE7 | -0.012 | -0.090 | -7.258 |
| S1 | -0.245 | -2.129 | -6.309 |
| S2 | 1.835 | 0.809 | -6.285 |
| S3 | 2.702 | -2.085 | -3.702 |
| S4 | -1.734 | 1.156 | -6.430 |
| S5 | -0.138 | -2.159 | -1.120 |
| S6 | -3.180 | -1.360 | -3.610 |
| S7 | -1.834 | 1.186 | -1.066 |
| S8 | 1.917 | 1.018 | -1.234 |
| S9 | 0.214 | 3.424 | -3.769 |
| N1 | 1.696 | -0.763 | 1.421 |
| H1 | 2.543 | -0.189 | 1.371 |
| H2 | 1.271 | -0.637 | 2.345 |
| H3 | 1.948 | -1.748 | 1.306 |
| O1 | -1.134 | -0.985 | 1.384 |
| H1 | -1.298 | -0.318 | 2.091 |
| O1 | 0.098 | 1.414 | 1.516 |
| H1 | -0.429 | 2.223 | 1.364 |
| S1 | 0.109 | -0.345 | -9.475 |
| H1 | 0.143 | 0.976 | -9.779 |
| N4 | -0.042 | 0.008 | -3.583 |
| H4 | 3.701 | -1.167 | -3.774 |
| H5 | -2.918 | -2.692 | -3.629 |
| H6 | -1.089 | 3.800 | -3.839 |

FeMoco (Fig. 3c)

| FE1 | -1.105 | -0.494 | -4.686 |
| --- | --- | --- | --- |
| FE2 | 0.322 | 1.596 | -5.197 |
| FE3 | 1.491 | -1.096 | -5.205 |
| FE4 | 1.024 | -0.819 | -2.548 |
| FE5 | -1.641 | -0.723 | -2.065 |
| FE6 | -0.100 | 1.475 | -2.463 |
| MO1 | 0.000 | 0.000 | 0.000 |
| FE7 | -0.038 | -0.170 | -7.125 |
| S1 | -0.270 | -2.149 | -6.057 |
| S2 | 1.968 | 0.700 | -6.503 |
| S3 | 2.732 | -1.713 | -3.575 |
| S4 | -1.614 | 1.163 | -6.197 |
| S5 | -0.185 | -2.141 | -1.224 |
| S6 | -2.981 | -1.173 | -3.669 |
| S7 | -1.823 | 1.235 | -1.025 |
| S8 | 1.827 | 0.918 | -1.279 |
| S9 | 0.501 | 3.140 | -3.717 |
| N1 | 1.810 | -0.725 | 1.340 |
| H1 | 2.635 | -0.128 | 1.243 |
| H2 | 1.460 | -0.642 | 2.297 |
| H3 | 2.082 | -1.698 | 1.175 |
| O1 | -0.950 | -1.210 | 1.378 |
| H1 | -1.024 | -0.648 | 2.183 |
| O1 | -0.041 | 1.306 | 1.585 |
| H1 | -0.601 | 2.101 | 1.476 |
| S1 | -0.332 | -0.469 | -9.320 |
| H1 | 0.196 | 0.723 | -9.695 |

FeFeco 2OH spin state A1 (Fig. 3d)

| FE1 | -1.076 | -0.844 | -4.824 |
| --- | --- | --- | --- |
| FE2 | 0.407 | 1.394 | -5.134 |
| FE3 | 1.606 | -0.913 | -5.467 |
| FE4 | 1.052 | -0.732 | -2.832 |
| FE5 | -1.631 | -0.688 | -2.223 |
| FE6 | -0.014 | 1.569 | -2.403 |
| FE7 | 0.000 | 0.000 | 0.000 |
| FE8 | -0.117 | -0.094 | -7.226 |
| S1A | -0.033 | -2.145 | -6.279 |
| S4A | 1.866 | 0.877 | -6.787 |
| S3A | 2.904 | -1.333 | -3.819 |
| S2A | -1.616 | 0.987 | -5.946 |
| S1B | -0.076 | -2.013 | -1.426 |
| S2B | -2.906 | -1.389 | -3.837 |
| S3B | -1.766 | 1.180 | -1.032 |
| S4B | 1.737 | 0.844 | -1.256 |
| S5 | 0.428 | 3.127 | -3.809 |
| N1 | 1.494 | -0.951 | 1.182 |
| H1 | 2.353 | -0.397 | 1.234 |
| H2 | 1.059 | -0.990 | 2.108 |
| H3 | 1.714 | -1.902 | 0.875 |
| O1 | -1.228 | -1.021 | 1.045 |
| H1 | -1.508 | -0.408 | 1.761 |
| O1 | 0.117 | 1.296 | 1.356 |
| H1 | -0.413 | 2.091 | 1.131 |
| S1 | -0.656 | -0.300 | -9.379 |
| H1 | 0.427 | 0.375 | -9.841 |

FeFeco 2OH spin state A2 (as in Fig. 3d)

| FE1 | -1.036 | -0.714 | -4.861 |
| --- | --- | --- | --- |
| FE2 | 0.315 | 1.564 | -5.237 |
| FE3 | 1.469 | -0.716 | -5.521 |
| FE4 | 1.145 | -0.811 | -2.877 |
| FE5 | -1.305 | -0.782 | -2.193 |
| FE6 | 0.209 | 1.417 | -2.396 |
| FE7 | 0.000 | 0.000 | 0.000 |
| FE8 | -0.254 | 0.068 | -7.347 |
| S1A | -0.067 | -2.011 | -6.443 |
| S4A | 1.764 | 1.009 | -6.917 |
| S3A | 2.859 | -1.423 | -4.103 |
| S2A | -1.746 | 1.125 | -6.072 |
| S1B | 0.145 | -2.046 | -1.221 |
| S2B | -2.681 | -1.459 | -3.620 |
| S3B | -1.626 | 1.102 | -1.162 |
| S4B | 1.944 | 0.682 | -1.245 |
| S5 | 0.588 | 3.069 | -3.703 |
| N1 | 1.360 | -0.861 | 1.369 |
| H1 | 1.788 | -0.062 | 1.849 |
| H2 | 0.725 | -1.352 | 2.009 |
| H3 | 2.081 | -1.495 | 1.017 |
| O1 | -1.278 | -0.884 | 1.108 |
| H1 | -1.944 | -0.231 | 1.417 |
| O1 | 0.260 | 1.466 | 1.166 |
| H1 | -0.140 | 2.296 | 0.831 |
| S1 | -0.869 | 0.058 | -9.497 |
| H1 | 0.291 | -0.465 | -9.968 |

FeFeco 1OH spin state A1 (Fig. 3e)

| FE1 | -1.154 | -0.935 | -4.658 |
| --- | --- | --- | --- |
| FE2 | 0.240 | 1.374 | -4.866 |
| FE3 | 1.511 | -0.914 | -5.194 |
| FE4 | 1.028 | -0.702 | -2.501 |
| FE5 | -1.688 | -0.667 | -2.087 |
| FE6 | -0.009 | 1.619 | -2.128 |
| FE7 | 0.000 | 0.000 | 0.000 |
| FE8 | -0.184 | -0.109 | -6.989 |
| S1 | -0.058 | -2.191 | -6.123 |
| S2 | 1.761 | 0.911 | -6.469 |
| S3 | 2.739 | -1.551 | -3.562 |
| S4 | -1.746 | 0.911 | -5.728 |
| S5 | -0.195 | -2.024 | -1.214 |
| S6 | -2.939 | -1.575 | -3.622 |
| S7 | -1.812 | 1.186 | -0.898 |
| S8 | 1.775 | 0.927 | -1.074 |
| S9 | 0.245 | 3.152 | -3.601 |
| N1 | 1.181 | -1.092 | 1.375 |
| H1 | 2.008 | -0.528 | 1.589 |
| H2 | 0.607 | -1.124 | 2.224 |
| H3 | 1.479 | -2.036 | 1.115 |
| O1 | -0.354 | 0.870 | 1.627 |
| H1 | -1.027 | 1.579 | 1.540 |
| S1 | -0.682 | -0.248 | -9.161 |
| H1 | 0.495 | 0.266 | -9.601 |

FeFeco 1OH spin state A2 (as in Fig. 3e)

| FE1 | -1.262 | -0.785 | -4.898 |
| --- | --- | --- | --- |
| FE2 | 0.161 | 1.492 | -5.136 |
| FE3 | 1.359 | -0.813 | -5.254 |
| FE4 | 1.049 | -0.812 | -2.507 |
| FE5 | -1.497 | -0.677 | -2.168 |
| FE6 | -0.040 | 1.457 | -2.291 |
| FE7 | 0.000 | 0.000 | 0.000 |
| FE8 | -0.183 | -0.049 | -7.238 |
| S1 | -0.116 | -2.124 | -6.314 |
| S2 | 1.769 | 0.920 | -6.631 |
| S3 | 2.673 | -1.558 | -3.765 |
| S4 | -1.816 | 1.026 | -6.171 |
| S5 | -0.215 | -2.057 | -1.066 |
| S6 | -2.882 | -1.403 | -3.580 |
| S7 | -1.779 | 1.095 | -0.898 |
| S8 | 1.791 | 0.890 | -1.149 |
| S9 | 0.223 | 3.081 | -3.676 |
| N1 | 1.265 | -1.003 | 1.390 |
| H1 | 2.027 | -0.355 | 1.611 |
| H2 | 0.684 | -1.103 | 2.229 |
| H3 | 1.660 | -1.909 | 1.124 |
| O1 | -0.403 | 0.839 | 1.647 |
| H1 | -1.092 | 1.533 | 1.590 |
| S1 | -0.544 | 0.062 | -9.441 |
| H1 | 0.706 | -0.328 | -9.801 |

FeFeco 2OH and spin state A1, H on 2S (Fig. 5a)

| FE1 | -1.071 | -0.712 | -4.809 |
| --- | --- | --- | --- |
| FE2 | 0.438 | 1.421 | -5.107 |
| FE3 | 1.509 | -0.846 | -5.364 |
| FE4 | 0.996 | -0.684 | -2.866 |
| FE5 | -1.553 | -0.690 | -2.284 |
| FE6 | -0.015 | 1.537 | -2.448 |
| FE7 | 0.000 | 0.000 | 0.000 |
| FE8 | -0.098 | -0.138 | -7.226 |
| S1A | -0.052 | -2.134 | -6.163 |
| S4A | 1.870 | 0.856 | -6.762 |
| S3A | 3.058 | -1.404 | -3.796 |
| S2A | -1.547 | 1.046 | -6.009 |
| S1B | -0.029 | -2.016 | -1.410 |
| S2B | -2.804 | -1.545 | -3.842 |
| S3B | -1.749 | 1.164 | -1.068 |
| S4B | 1.736 | 0.855 | -1.290 |
| S5 | 0.364 | 3.166 | -3.815 |
| N1 | 1.494 | -0.951 | 1.182 |
| H1 | 2.353 | -0.397 | 1.234 |
| H2 | 1.059 | -0.990 | 2.108 |
| H3 | 1.714 | -1.902 | 0.875 |
| O1 | -1.228 | -1.021 | 1.045 |
| H1 | -1.508 | -0.408 | 1.761 |
| O1 | 0.117 | 1.296 | 1.356 |
| H1 | -0.413 | 2.091 | 1.131 |
| S1 | -0.656 | -0.300 | -9.379 |
| H1 | 0.427 | 0.375 | -9.841 |
| H4 | 2.878 | -2.750 | -3.766 |

FeFeco 2OH and spin state A2, H on 2S (as in Fig. 5a)

| FE1 | -1.033 | -0.705 | -4.853 |
| --- | --- | --- | --- |
| FE2 | 0.291 | 1.490 | -5.087 |
| FE3 | 1.449 | -0.863 | -5.561 |
| FE4 | 1.161 | -0.721 | -2.925 |
| FE5 | -1.231 | -0.761 | -2.251 |
| FE6 | 0.220 | 1.459 | -2.391 |
| FE7 | 0.000 | 0.000 | 0.000 |
| FE8 | -0.251 | 0.061 | -7.340 |
| S1A | -0.182 | -2.055 | -6.500 |
| S4A | 1.762 | 0.996 | -6.782 |
| S3A | 3.029 | -1.611 | -4.093 |
| S2A | -1.731 | 1.135 | -6.057 |
| S1B | 0.213 | -2.003 | -1.248 |
| S2B | -2.660 | -1.476 | -3.601 |
| S3B | -1.589 | 1.094 | -1.168 |
| S4B | 1.955 | 0.748 | -1.288 |
| S5 | 0.391 | 3.147 | -3.676 |
| N1 | 1.360 | -0.861 | 1.369 |
| H1 | 1.788 | -0.062 | 1.849 |
| H2 | 0.725 | -1.352 | 2.009 |
| H3 | 2.081 | -1.495 | 1.017 |
| O1 | -1.278 | -0.884 | 1.108 |
| H1 | -1.944 | -0.231 | 1.417 |
| O1 | 0.260 | 1.466 | 1.166 |
| H1 | -0.140 | 2.296 | 0.831 |
| S1 | -0.869 | 0.058 | -9.497 |
| H1 | 0.291 | -0.465 | -9.968 |
| H4 | 2.714 | -2.934 | -4.139 |

FeFeco 1OH and spin state A1, H on 2S (as in Fig. 5a)

| FE1 | -1.165 | -0.960 | -4.658 |
| --- | --- | --- | --- |
| FE2 | 0.220 | 1.329 | -4.810 |
| FE3 | 1.495 | -0.889 | -5.092 |
| FE4 | 1.102 | -0.668 | -2.508 |
| FE5 | -1.621 | -0.676 | -2.131 |
| FE6 | 0.009 | 1.575 | -2.146 |
| FE7 | 0.000 | 0.000 | 0.000 |
| FE8 | -0.165 | -0.190 | -6.982 |
| S1A | 0.065 | -2.276 | -5.978 |
| S4A | 1.738 | 0.878 | -6.429 |
| S3A | 3.167 | -1.142 | -3.550 |
| S2A | -1.722 | 0.918 | -5.720 |
| S1B | -0.129 | -2.023 | -1.265 |
| S2B | -2.973 | -1.556 | -3.581 |
| S3B | -1.798 | 1.159 | -0.911 |
| S4B | 1.782 | 0.952 | -1.029 |
| S5 | 0.275 | 3.139 | -3.584 |
| N1 | 1.181 | -1.092 | 1.375 |
| H1 | 2.008 | -0.528 | 1.589 |
| H2 | 0.607 | -1.124 | 2.224 |
| H3 | 1.479 | -2.036 | 1.115 |
| O1 | -0.354 | 0.870 | 1.627 |
| H1 | -1.027 | 1.579 | 1.540 |
| S1 | -0.682 | -0.248 | -9.161 |
| H1 | 0.495 | 0.266 | -9.601 |
| H4 | 3.280 | -2.497 | -3.517 |

FeFeco 1OH and spin state A2, H on 2S (as in Fig. 5a)

| FE1 | -1.255 | -0.788 | -4.895 |
| --- | --- | --- | --- |
| FE2 | 0.153 | 1.505 | -5.139 |
| FE3 | 1.312 | -0.790 | -5.254 |
| FE4 | 0.993 | -0.782 | -2.504 |
| FE5 | -1.484 | -0.693 | -2.175 |
| FE6 | -0.014 | 1.467 | -2.277 |
| FE7 | 0.000 | 0.000 | 0.000 |
| FE8 | -0.177 | -0.048 | -7.240 |
| S1A | -0.151 | -2.137 | -6.344 |
| S4A | 1.768 | 0.946 | -6.630 |
| S3A | 2.812 | -1.609 | -3.723 |
| S2A | -1.811 | 1.035 | -6.179 |
| S1B | -0.215 | -2.060 | -1.057 |
| S2B | -2.886 | -1.400 | -3.578 |
| S3B | -1.772 | 1.075 | -0.913 |
| S4B | 1.792 | 0.900 | -1.146 |
| S5 | 0.214 | 3.088 | -3.669 |
| N1 | 1.265 | -1.003 | 1.390 |
| H1 | 2.027 | -0.355 | 1.611 |
| H2 | 0.684 | -1.103 | 2.229 |
| H3 | 1.660 | -1.909 | 1.124 |
| O1 | -0.403 | 0.839 | 1.647 |
| H1 | -1.092 | 1.533 | 1.590 |
| S1 | -0.544 | 0.062 | -9.441 |
| H1 | 0.706 | -0.328 | -9.801 |
| H4 | 2.446 | -2.911 | -3.854 |

FeMoco, H on 2S (as in Fig. 5a)

| FE1 | -0.929 | -0.411 | -4.509 |
| --- | --- | --- | --- |
| FE2 | 0.341 | 1.615 | -5.160 |
| FE3 | 1.513 | -0.970 | -5.167 |
| FE4 | 1.047 | -0.786 | -2.572 |
| FE5 | -1.584 | -0.718 | -2.051 |
| FE6 | -0.073 | 1.482 | -2.518 |
| MO1 | 0.000 | 0.000 | 0.000 |
| FE7 | -0.071 | -0.156 | -7.112 |
| S1 | -0.218 | -2.103 | -5.935 |
| S2 | 1.931 | 0.778 | -6.555 |
| S3 | 2.803 | -1.606 | -3.573 |
| S4 | -1.616 | 1.155 | -6.061 |
| S5 | -0.105 | -2.144 | -1.230 |
| S6 | -3.081 | -1.157 | -3.712 |
| S7 | -1.794 | 1.265 | -1.054 |
| S8 | 1.820 | 0.948 | -1.252 |
| S9 | 0.537 | 3.190 | -3.712 |
| N1 | 1.810 | -0.725 | 1.340 |
| H1 | 2.635 | -0.128 | 1.243 |
| H2 | 1.460 | -0.642 | 2.297 |
| H3 | 2.082 | -1.698 | 1.175 |
| O1 | -0.950 | -1.210 | 1.378 |
| H1 | -1.024 | -0.648 | 2.183 |
| O1 | -0.041 | 1.306 | 1.585 |
| H1 | -0.601 | 2.101 | 1.476 |
| S1 | -0.332 | -0.469 | -9.320 |
| H1 | 0.196 | 0.723 | -9.695 |
| H3 | -2.901 | -2.505 | -3.723 |

FeFeco 2OH and spin state A1, H on upper Fe (Fig. 5b)

| FE1 | -1.043 | -0.754 | -4.816 |
| --- | --- | --- | --- |
| FE2 | 0.424 | 1.378 | -5.063 |
| FE3 | 1.599 | -0.892 | -5.491 |
| FE4 | 0.983 | -0.718 | -2.960 |
| FE5 | -1.591 | -0.672 | -2.298 |
| FE6 | -0.009 | 1.547 | -2.432 |
| FE7 | 0.000 | 0.000 | 0.000 |
| FE8 | -0.182 | -0.093 | -7.212 |
| S1A | -0.008 | -2.085 | -6.213 |
| S4A | 1.793 | 0.869 | -6.768 |
| S3A | 2.873 | -1.336 | -3.922 |
| S2A | -1.616 | 1.032 | -5.927 |
| S1B | -0.065 | -1.985 | -1.444 |
| S2B | -2.875 | -1.382 | -3.879 |
| S3B | -1.745 | 1.169 | -1.047 |
| S4B | 1.752 | 0.770 | -1.353 |
| S5 | 0.341 | 3.157 | -3.814 |
| N1 | 1.494 | -0.951 | 1.182 |
| H1 | 2.353 | -0.397 | 1.234 |
| H2 | 1.059 | -0.990 | 2.108 |
| H3 | 1.714 | -1.902 | 0.875 |
| O1 | -1.228 | -1.021 | 1.045 |
| H1 | -1.508 | -0.408 | 1.761 |
| O1 | 0.117 | 1.296 | 1.356 |
| H1 | -0.413 | 2.091 | 1.131 |
| S1 | -0.656 | -0.300 | -9.379 |
| H1 | 0.427 | 0.375 | -9.841 |
| H4 | 2.675 | -1.513 | -6.360 |

FeFeco 2OH and spin state A2, H on upper Fe (as in Fig. 5b)

| FE1 | -1.037 | -0.671 | -4.861 |
| --- | --- | --- | --- |
| FE2 | 0.272 | 1.581 | -5.226 |
| FE3 | 1.468 | -0.711 | -5.560 |
| FE4 | 1.150 | -0.788 | -2.899 |
| FE5 | -1.287 | -0.770 | -2.223 |
| FE6 | 0.233 | 1.432 | -2.381 |
| FE7 | 0.000 | 0.000 | 0.000 |
| FE8 | -0.315 | 0.094 | -7.331 |
| S1A | -0.080 | -1.967 | -6.440 |
| S4A | 1.689 | 1.020 | -6.889 |
| S3A | 2.843 | -1.397 | -4.165 |
| S2A | -1.799 | 1.160 | -6.050 |
| S1B | 0.143 | -2.032 | -1.237 |
| S2B | -2.667 | -1.471 | -3.617 |
| S3B | -1.610 | 1.104 | -1.174 |
| S4B | 1.982 | 0.634 | -1.272 |
| S5 | 0.512 | 3.098 | -3.701 |
| N1 | 1.360 | -0.861 | 1.369 |
| H1 | 1.788 | -0.062 | 1.849 |
| H2 | 0.725 | -1.352 | 2.009 |
| H3 | 2.081 | -1.495 | 1.017 |
| O1 | -1.278 | -0.884 | 1.108 |
| H1 | -1.944 | -0.231 | 1.417 |
| O1 | 0.260 | 1.466 | 1.166 |
| H1 | -0.140 | 2.296 | 0.831 |
| S1 | -0.869 | 0.058 | -9.497 |
| H1 | 0.291 | -0.465 | -9.968 |
| H4 | 2.443 | -1.328 | -6.540 |

FeFeco 1OH and spin state A1, H on upper Fe (as in Fig. 5b)

| FE1 | -1.165 | -0.845 | -4.624 |
| --- | --- | --- | --- |
| FE2 | 0.229 | 1.395 | -4.854 |
| FE3 | 1.478 | -0.922 | -5.174 |
| FE4 | 1.070 | -0.698 | -2.470 |
| FE5 | -1.653 | -0.691 | -2.054 |
| FE6 | -0.017 | 1.582 | -2.163 |
| FE7 | 0.000 | 0.000 | 0.000 |
| FE8 | -0.255 | -0.090 | -6.966 |
| S1A | -0.100 | -2.142 | -6.053 |
| S4A | 1.708 | 0.894 | -6.431 |
| S3A | 2.712 | -1.599 | -3.603 |
| S2A | -1.776 | 0.966 | -5.697 |
| S1B | -0.165 | -2.024 | -1.186 |
| S2B | -2.914 | -1.569 | -3.576 |
| S3B | -1.801 | 1.172 | -0.912 |
| S4B | 1.778 | 0.934 | -1.083 |
| S5 | 0.211 | 3.163 | -3.587 |
| N1 | 1.181 | -1.092 | 1.375 |
| H1 | 2.008 | -0.528 | 1.589 |
| H2 | 0.607 | -1.124 | 2.224 |
| H3 | 1.479 | -2.036 | 1.115 |
| O1 | -0.354 | 0.870 | 1.627 |
| H1 | -1.027 | 1.579 | 1.540 |
| S1 | -0.682 | -0.248 | -9.161 |
| H1 | 0.495 | 0.266 | -9.601 |
| H4 | 2.559 | -1.522 | -6.083 |

FeFeco 1OH and spin state A2, H on upper Fe (as in Fig. 5b)

| FE1 | -1.221 | -0.728 | -4.862 |
| --- | --- | --- | --- |
| FE2 | 0.132 | 1.499 | -5.086 |
| FE3 | 1.376 | -0.830 | -5.304 |
| FE4 | 1.004 | -0.756 | -2.562 |
| FE5 | -1.497 | -0.705 | -2.176 |
| FE6 | -0.011 | 1.500 | -2.250 |
| FE7 | 0.000 | 0.000 | 0.000 |
| FE8 | -0.233 | 0.005 | -7.226 |
| S1A | -0.122 | -2.060 | -6.313 |
| S4A | 1.719 | 0.925 | -6.580 |
| S3A | 2.629 | -1.556 | -3.830 |
| S2A | -1.848 | 1.076 | -6.127 |
| S1B | -0.206 | -2.053 | -1.082 |
| S2B | -2.872 | -1.414 | -3.590 |
| S3B | -1.773 | 1.075 | -0.924 |
| S4B | 1.822 | 0.860 | -1.168 |
| S5 | 0.167 | 3.117 | -3.649 |
| N1 | 1.265 | -1.003 | 1.390 |
| H1 | 2.027 | -0.355 | 1.611 |
| H2 | 0.684 | -1.103 | 2.229 |
| H3 | 1.660 | -1.909 | 1.124 |
| O1 | -0.403 | 0.839 | 1.647 |
| H1 | -1.092 | 1.533 | 1.590 |
| S1 | -0.544 | 0.062 | -9.441 |
| H1 | 0.706 | -0.328 | -9.801 |
| H4 | 2.386 | -1.475 | -6.234 |

FeMoco, H on upper Fe (as in Fig. 5b)

| FE1 | -1.097 | -0.493 | -4.658 |
| --- | --- | --- | --- |
| FE2 | 0.371 | 1.531 | -5.177 |
| FE3 | 1.474 | -0.932 | -5.165 |
| FE4 | 0.961 | -0.768 | -2.582 |
| FE5 | -1.647 | -0.717 | -2.058 |
| FE6 | -0.114 | 1.480 | -2.477 |
| MO1 | 0.000 | 0.000 | 0.000 |
| FE7 | -0.098 | -0.147 | -7.116 |
| S1 | -0.187 | -2.076 | -5.934 |
| S2 | 1.908 | 0.697 | -6.559 |
| S3 | 2.755 | -1.471 | -3.625 |
| S4 | -1.612 | 1.178 | -6.101 |
| S5 | -0.190 | -2.135 | -1.231 |
| S6 | -2.953 | -1.209 | -3.679 |
| S7 | -1.834 | 1.239 | -1.019 |
| S8 | 1.815 | 0.922 | -1.277 |
| S9 | 0.593 | 3.097 | -3.743 |
| N1 | 1.810 | -0.725 | 1.340 |
| H1 | 2.635 | -0.128 | 1.243 |
| H2 | 1.460 | -0.642 | 2.297 |
| H3 | 2.082 | -1.698 | 1.175 |
| O1 | -0.950 | -1.210 | 1.378 |
| H1 | -1.024 | -0.648 | 2.183 |
| O1 | -0.041 | 1.306 | 1.585 |
| H1 | -0.601 | 2.101 | 1.476 |
| S1 | -0.332 | -0.469 | -9.320 |
| H1 | 0.196 | 0.723 | -9.695 |
| H3 | 2.410 | -1.775 | -5.996 |

FeFeco 2OH and spin state A1, H on lower Fe (Fig. 5c)

| FE1 | -1.034 | -0.648 | -4.826 |
| --- | --- | --- | --- |
| FE2 | 0.443 | 1.503 | -5.293 |
| FE3 | 1.550 | -0.819 | -5.461 |
| FE4 | 1.039 | -0.752 | -2.809 |
| FE5 | -1.612 | -0.724 | -2.274 |
| FE6 | -0.019 | 1.490 | -2.542 |
| FE7 | 0.000 | 0.000 | 0.000 |
| FE8 | -0.138 | -0.111 | -7.228 |
| S1A | -0.114 | -2.076 | -6.198 |
| S4A | 1.871 | 0.866 | -6.881 |
| S3A | 2.832 | -1.442 | -3.869 |
| S2A | -1.601 | 1.037 | -6.048 |
| S1B | -0.090 | -2.026 | -1.399 |
| S2B | -2.774 | -1.461 | -3.920 |
| S3B | -1.714 | 1.153 | -1.121 |
| S4B | 1.719 | 0.841 | -1.288 |
| S5 | 0.517 | 3.116 | -3.874 |
| N1 | 1.494 | -0.951 | 1.182 |
| H1 | 2.353 | -0.397 | 1.234 |
| H2 | 1.059 | -0.990 | 2.108 |
| H3 | 1.714 | -1.902 | 0.875 |
| O1 | -1.228 | -1.021 | 1.045 |
| H1 | -1.508 | -0.408 | 1.761 |
| O1 | 0.117 | 1.296 | 1.356 |
| H1 | -0.413 | 2.091 | 1.131 |
| S1 | -0.656 | -0.300 | -9.379 |
| H1 | 0.427 | 0.375 | -9.841 |
| H4 | -2.803 | -1.338 | -1.515 |

FeFeco 2OH and spin state A2, H on lower Fe (as in Fig. 5c)

| FE1 | -1.104 | -0.691 | -4.815 |
| --- | --- | --- | --- |
| FE2 | 0.253 | 1.399 | -5.083 |
| FE3 | 1.344 | -0.859 | -5.452 |
| FE4 | 0.973 | -0.785 | -2.936 |
| FE5 | -1.499 | -0.720 | -2.196 |
| FE6 | -0.029 | 1.414 | -2.439 |
| FE7 | 0.000 | 0.000 | 0.000 |
| FE8 | -0.345 | 0.004 | -7.315 |
| S1A | -0.202 | -2.074 | -6.397 |
| S4A | 1.690 | 0.865 | -6.762 |
| S3A | 2.705 | -1.604 | -4.036 |
| S2A | -1.793 | 1.106 | -6.028 |
| S1B | -0.026 | -1.999 | -1.341 |
| S2B | -2.794 | -1.414 | -3.622 |
| S3B | -1.725 | 1.102 | -1.080 |
| S4B | 1.732 | 0.745 | -1.382 |
| S5 | 0.280 | 3.097 | -3.692 |
| N1 | 1.360 | -0.861 | 1.369 |
| H1 | 1.788 | -0.062 | 1.849 |
| H2 | 0.725 | -1.352 | 2.009 |
| H3 | 2.081 | -1.495 | 1.017 |
| O1 | -1.278 | -0.884 | 1.108 |
| H1 | -1.944 | -0.231 | 1.417 |
| O1 | 0.260 | 1.466 | 1.166 |
| H1 | -0.140 | 2.296 | 0.831 |
| S1 | -0.869 | 0.058 | -9.497 |
| H1 | 0.291 | -0.465 | -9.968 |
| H4 | -2.530 | -1.259 | -1.233 |

FeFeco 1OH and spin state A1, H on lower Fe (as in Fig. 5c)

| FE1 | -1.141 | -0.688 | -4.633 |
| --- | --- | --- | --- |
| FE2 | 0.320 | 1.474 | -5.067 |
| FE3 | 1.442 | -0.830 | -5.150 |
| FE4 | 0.998 | -0.784 | -2.449 |
| FE5 | -1.740 | -0.778 | -2.032 |
| FE6 | -0.085 | 1.437 | -2.311 |
| FE7 | 0.000 | 0.000 | 0.000 |
| FE8 | -0.186 | -0.156 | -6.999 |
| S1A | -0.176 | -2.112 | -5.957 |
| S4A | 1.806 | 0.820 | -6.599 |
| S3A | 2.714 | -1.530 | -3.589 |
| S2A | -1.691 | 0.983 | -5.883 |
| S1B | -0.216 | -2.079 | -1.129 |
| S2B | -2.853 | -1.536 | -3.715 |
| S3B | -1.794 | 1.127 | -0.929 |
| S4B | 1.717 | 0.927 | -1.131 |
| S5 | 0.337 | 3.088 | -3.650 |
| N1 | 1.181 | -1.092 | 1.375 |
| H1 | 2.008 | -0.528 | 1.589 |
| H2 | 0.607 | -1.124 | 2.224 |
| H3 | 1.479 | -2.036 | 1.115 |
| O1 | -0.354 | 0.870 | 1.627 |
| H1 | -1.027 | 1.579 | 1.540 |
| S1 | -0.682 | -0.248 | -9.161 |
| H1 | 0.495 | 0.266 | -9.601 |
| H4 | -2.984 | -1.365 | -1.315 |

FeFeco 1OH and spin state A2, H on lower Fe (as in Fig. 5c)

| FE1 | -1.172 | -0.716 | -4.776 |
| --- | --- | --- | --- |
| FE2 | 0.183 | 1.402 | -4.963 |
| FE3 | 1.369 | -0.827 | -5.196 |
| FE4 | 0.974 | -0.749 | -2.596 |
| FE5 | -1.581 | -0.715 | -2.084 |
| FE6 | -0.017 | 1.537 | -2.182 |
| FE7 | 0.000 | 0.000 | 0.000 |
| FE8 | -0.208 | -0.039 | -7.209 |
| S1A | -0.084 | -2.094 | -6.217 |
| S4A | 1.749 | 0.896 | -6.512 |
| S3A | 2.663 | -1.616 | -3.744 |
| S2A | -1.799 | 1.022 | -6.045 |
| S1B | -0.201 | -2.024 | -1.098 |
| S2B | -2.874 | -1.353 | -3.548 |
| S3B | -1.778 | 1.093 | -0.895 |
| S4B | 1.816 | 0.858 | -1.146 |
| S5 | 0.198 | 3.111 | -3.622 |
| N1 | 1.265 | -1.003 | 1.390 |
| H1 | 2.027 | -0.355 | 1.611 |
| H2 | 0.684 | -1.103 | 2.229 |
| H3 | 1.660 | -1.909 | 1.124 |
| O1 | -0.403 | 0.839 | 1.647 |
| H1 | -1.092 | 1.533 | 1.590 |
| S1 | -0.544 | 0.062 | -9.441 |
| H1 | 0.706 | -0.328 | -9.801 |
| H4 | -2.639 | -1.270 | -1.166 |

FeMoco, H on lower Fe (as in Fig. 5c)

| FE1 | -1.104 | -0.508 | -4.678 |
| --- | --- | --- | --- |
| FE2 | 0.314 | 1.578 | -5.176 |
| FE3 | 1.477 | -1.065 | -5.175 |
| FE4 | 1.040 | -0.800 | -2.523 |
| FE5 | -1.623 | -0.699 | -2.052 |
| FE6 | -0.065 | 1.488 | -2.444 |
| MO1 | 0.000 | 0.000 | 0.000 |
| FE7 | -0.054 | -0.178 | -7.116 |
| S1 | -0.254 | -2.154 | -6.037 |
| S2 | 1.955 | 0.707 | -6.504 |
| S3 | 2.728 | -1.714 | -3.568 |
| S4 | -1.632 | 1.149 | -6.156 |
| S5 | -0.195 | -2.120 | -1.231 |
| S6 | -2.928 | -1.154 | -3.642 |
| S7 | -1.796 | 1.246 | -1.039 |
| S8 | 1.840 | 0.933 | -1.264 |
| S9 | 0.506 | 3.140 | -3.723 |
| N1 | 1.810 | -0.725 | 1.340 |
| H1 | 2.635 | -0.128 | 1.243 |
| H2 | 1.460 | -0.642 | 2.297 |
| H3 | 2.082 | -1.698 | 1.175 |
| O1 | -0.950 | -1.210 | 1.378 |
| H1 | -1.024 | -0.648 | 2.183 |
| O1 | -0.041 | 1.306 | 1.585 |
| H1 | -0.601 | 2.101 | 1.476 |
| S1 | -0.332 | -0.469 | -9.320 |
| H1 | 0.196 | 0.723 | -9.695 |
| H3 | -2.853 | -1.306 | -1.357 |

FeFeco 2OH and spin state A1, H on 3S (Fig. 5d)

| FE1 | -0.969 | -0.774 | -4.737 |
| --- | --- | --- | --- |
| FE2 | 0.429 | 1.438 | -5.163 |
| FE3 | 1.616 | -0.834 | -5.527 |
| FE4 | 1.029 | -0.930 | -2.954 |
| FE5 | -1.446 | -0.869 | -2.106 |
| FE6 | 0.067 | 1.338 | -2.503 |
| FE7 | 0.000 | 0.000 | 0.000 |
| FE8 | -0.169 | -0.050 | -7.221 |
| S1A | -0.050 | -2.096 | -6.278 |
| S4A | 1.825 | 0.951 | -6.865 |
| S3A | 2.945 | -1.359 | -3.942 |
| S2A | -1.619 | 1.016 | -5.870 |
| S1B | -0.052 | -2.669 | -1.735 |
| S2B | -2.779 | -1.407 | -3.705 |
| S3B | -1.719 | 1.070 | -1.125 |
| S4B | 1.745 | 0.530 | -1.328 |
| S5 | 0.529 | 3.060 | -3.717 |
| N1 | 1.494 | -0.951 | 1.182 |
| H1 | 2.353 | -0.397 | 1.234 |
| H2 | 1.059 | -0.990 | 2.108 |
| H3 | 1.714 | -1.902 | 0.875 |
| O1 | -1.228 | -1.021 | 1.045 |
| H1 | -1.508 | -0.408 | 1.761 |
| O1 | 0.117 | 1.296 | 1.356 |
| H1 | -0.413 | 2.091 | 1.131 |
| S1 | -0.656 | -0.300 | -9.379 |
| H1 | 0.427 | 0.375 | -9.841 |
| H4 | -0.567 | -3.461 | -2.712 |

FeFeco 2OH and spin state A2, H on 3S (as in Fig. 5d)

| FE1 | -1.054 | -0.785 | -5.001 |
| --- | --- | --- | --- |
| FE2 | 0.373 | 1.390 | -5.032 |
| FE3 | 1.440 | -0.873 | -5.639 |
| FE4 | 1.135 | -0.721 | -3.106 |
| FE5 | -1.241 | -0.700 | -2.352 |
| FE6 | 0.252 | 1.435 | -2.324 |
| FE7 | 0.000 | 0.000 | 0.000 |
| FE8 | -0.256 | 0.133 | -7.361 |
| S1A | -0.122 | -2.012 | -6.651 |
| S4A | 1.768 | 0.978 | -6.797 |
| S3A | 2.755 | -1.726 | -4.247 |
| S2A | -1.693 | 1.162 | -6.023 |
| S1B | 0.182 | -2.157 | -1.209 |
| S2B | -2.675 | -1.496 | -3.721 |
| S3B | -1.586 | 1.132 | -1.158 |
| S4B | 1.917 | 0.470 | -1.310 |
| S5 | 0.359 | 3.089 | -3.639 |
| N1 | 1.360 | -0.861 | 1.369 |
| H1 | 1.788 | -0.062 | 1.849 |
| H2 | 0.725 | -1.352 | 2.009 |
| H3 | 2.081 | -1.495 | 1.017 |
| O1 | -1.278 | -0.884 | 1.108 |
| H1 | -1.944 | -0.231 | 1.417 |
| O1 | 0.260 | 1.466 | 1.166 |
| H1 | -0.140 | 2.296 | 0.831 |
| S1 | -0.869 | 0.058 | -9.497 |
| H1 | 0.291 | -0.465 | -9.968 |
| H4 | -0.969 | -2.876 | -1.037 |

FeFeco 1OH and spin state A1, H on 3S (as in Fig. 5d)

| FE1 | -1.108 | -0.810 | -4.632 |
| --- | --- | --- | --- |
| FE2 | 0.410 | 1.356 | -4.980 |
| FE3 | 1.487 | -1.045 | -5.256 |
| FE4 | 0.931 | -1.065 | -2.648 |
| FE5 | -1.621 | -0.927 | -2.045 |
| FE6 | -0.012 | 1.228 | -2.341 |
| FE7 | 0.000 | 0.000 | 0.000 |
| FE8 | -0.169 | -0.150 | -6.990 |
| S1A | -0.207 | -2.215 | -6.107 |
| S4A | 1.875 | 0.733 | -6.564 |
| S3A | 2.705 | -1.845 | -3.688 |
| S2A | -1.623 | 1.040 | -5.758 |
| S1B | -0.267 | -2.697 | -1.388 |
| S2B | -2.912 | -1.534 | -3.664 |
| S3B | -1.791 | 0.987 | -0.969 |
| S4B | 1.744 | 0.521 | -1.239 |
| S5 | 0.538 | 2.948 | -3.518 |
| N1 | 1.181 | -1.092 | 1.375 |
| H1 | 2.008 | -0.528 | 1.589 |
| H2 | 0.607 | -1.124 | 2.224 |
| H3 | 1.479 | -2.036 | 1.115 |
| O1 | -0.354 | 0.870 | 1.627 |
| H1 | -1.027 | 1.579 | 1.540 |
| S1 | -0.682 | -0.248 | -9.161 |
| H1 | 0.495 | 0.266 | -9.601 |
| H4 | -0.637 | -3.601 | -2.334 |

FeFeco 1OH and spin state A2, H on 3S (as in Fig. 5d)

| FE1 | -1.250 | -0.810 | -4.948 |
| --- | --- | --- | --- |
| FE2 | 0.156 | 1.444 | -5.015 |
| FE3 | 1.276 | -0.843 | -5.224 |
| FE4 | 0.998 | -0.811 | -2.613 |
| FE5 | -1.426 | -0.662 | -2.262 |
| FE6 | -0.017 | 1.462 | -2.250 |
| FE7 | 0.000 | 0.000 | 0.000 |
| FE8 | -0.181 | -0.009 | -7.247 |
| S1A | -0.104 | -2.111 | -6.383 |
| S4A | 1.757 | 0.903 | -6.527 |
| S3A | 2.613 | -1.692 | -3.825 |
| S2A | -1.783 | 1.068 | -6.136 |
| S1B | -0.185 | -2.277 | -0.953 |
| S2B | -2.873 | -1.427 | -3.632 |
| S3B | -1.773 | 1.046 | -0.908 |
| S4B | 1.789 | 0.752 | -1.172 |
| S5 | 0.186 | 3.103 | -3.615 |
| N1 | 1.265 | -1.003 | 1.390 |
| H1 | 2.027 | -0.355 | 1.611 |
| H2 | 0.684 | -1.103 | 2.229 |
| H3 | 1.660 | -1.909 | 1.124 |
| O1 | -0.403 | 0.839 | 1.647 |
| H1 | -1.092 | 1.533 | 1.590 |
| S1 | -0.544 | 0.062 | -9.441 |
| H1 | 0.706 | -0.328 | -9.801 |
| H4 | -1.483 | -2.700 | -1.051 |

FeMoco, H on 3S (as in Fig. 5d)

| FE1 | -1.042 | -0.553 | -4.658 |
| --- | --- | --- | --- |
| FE2 | 0.231 | 1.651 | -5.178 |
| FE3 | 1.528 | -0.976 | -5.185 |
| FE4 | 1.183 | -0.773 | -2.463 |
| FE5 | -1.549 | -0.798 | -2.083 |
| FE6 | -0.091 | 1.406 | -2.454 |
| MO1 | 0.000 | 0.000 | 0.000 |
| FE7 | -0.041 | -0.135 | -7.117 |
| S1 | -0.144 | -2.136 | -6.072 |
| S2 | 1.914 | 0.841 | -6.500 |
| S3 | 2.849 | -1.576 | -3.608 |
| S4 | -1.688 | 1.090 | -6.139 |
| S5 | 0.060 | -2.256 | -1.160 |
| S6 | -2.906 | -1.350 | -3.625 |
| S7 | -1.850 | 1.126 | -1.070 |
| S8 | 1.821 | 1.002 | -1.251 |
| S9 | 0.411 | 3.151 | -3.653 |
| N1 | 1.810 | -0.725 | 1.340 |
| H1 | 2.635 | -0.128 | 1.243 |
| H2 | 1.460 | -0.642 | 2.297 |
| H3 | 2.082 | -1.698 | 1.175 |
| O1 | -0.950 | -1.210 | 1.378 |
| H1 | -1.024 | -0.648 | 2.183 |
| O1 | -0.041 | 1.306 | 1.585 |
| H1 | -0.601 | 2.101 | 1.476 |
| S1 | -0.332 | -0.469 | -9.320 |
| H1 | 0.196 | 0.723 | -9.695 |
| H3 | -1.165 | -2.615 | -1.840 |

FeFeco 2OH and spin state A1, H in cluster (Fig. 5e)

| FE1 | -1.153 | -0.807 | -4.902 |
| --- | --- | --- | --- |
| FE2 | 0.386 | 1.432 | -5.144 |
| FE3 | 1.597 | -0.862 | -5.443 |
| FE4 | 1.097 | -0.712 | -2.766 |
| FE5 | -1.567 | -0.656 | -2.273 |
| FE6 | 0.024 | 1.580 | -2.410 |
| FE7 | 0.000 | 0.000 | 0.000 |
| FE8 | -0.107 | -0.089 | -7.239 |
| S1A | -0.034 | -2.118 | -6.258 |
| S4A | 1.850 | 0.917 | -6.788 |
| S3A | 2.852 | -1.475 | -3.819 |
| S2A | -1.619 | 1.010 | -6.016 |
| S1B | -0.077 | -2.017 | -1.381 |
| S2B | -2.859 | -1.521 | -3.815 |
| S3B | -1.746 | 1.196 | -1.043 |
| S4B | 1.776 | 0.859 | -1.236 |
| S5 | 0.413 | 3.164 | -3.833 |
| N1 | 1.494 | -0.951 | 1.182 |
| H1 | 2.353 | -0.397 | 1.234 |
| H2 | 1.059 | -0.990 | 2.108 |
| H3 | 1.714 | -1.902 | 0.875 |
| O1 | -1.228 | -1.021 | 1.045 |
| H1 | -1.508 | -0.408 | 1.761 |
| O1 | 0.117 | 1.296 | 1.356 |
| H1 | -0.413 | 2.091 | 1.131 |
| S1 | -0.656 | -0.300 | -9.379 |
| H1 | 0.427 | 0.375 | -9.841 |
| H4 | -0.374 | 0.062 | -3.449 |

FeFeco 2OH and spin state A2, H in cluster (as in Fig. 5e)

| FE1 | -1.084 | -0.783 | -4.940 |
| --- | --- | --- | --- |
| FE2 | 0.302 | 1.438 | -5.095 |
| FE3 | 1.482 | -0.826 | -5.533 |
| FE4 | 1.228 | -0.765 | -2.873 |
| FE5 | -1.272 | -0.713 | -2.247 |
| FE6 | 0.219 | 1.490 | -2.324 |
| FE7 | 0.000 | 0.000 | 0.000 |
| FE8 | -0.251 | 0.062 | -7.354 |
| S1A | -0.066 | -2.046 | -6.513 |
| S4A | 1.759 | 0.970 | -6.797 |
| S3A | 2.854 | -1.593 | -4.127 |
| S2A | -1.739 | 1.097 | -6.071 |
| S1B | 0.160 | -2.010 | -1.240 |
| S2B | -2.696 | -1.464 | -3.625 |
| S3B | -1.633 | 1.143 | -1.097 |
| S4B | 1.964 | 0.712 | -1.233 |
| S5 | 0.371 | 3.123 | -3.695 |
| N1 | 1.360 | -0.861 | 1.369 |
| H1 | 1.788 | -0.062 | 1.849 |
| H2 | 0.725 | -1.352 | 2.009 |
| H3 | 2.081 | -1.495 | 1.017 |
| O1 | -1.278 | -0.884 | 1.108 |
| H1 | -1.944 | -0.231 | 1.417 |
| O1 | 0.260 | 1.466 | 1.166 |
| H1 | -0.140 | 2.296 | 0.831 |
| S1 | -0.869 | 0.058 | -9.497 |
| H1 | 0.291 | -0.465 | -9.968 |
| H4 | -0.176 | 0.173 | -3.619 |

FeFeco 1OH and spin state A1, H in cluster (as in Fig. 5e)

| FE1 | -1.574 | -0.787 | -4.903 |
| --- | --- | --- | --- |
| FE2 | 0.013 | 1.411 | -4.905 |
| FE3 | 1.157 | -0.801 | -4.957 |
| FE4 | 1.207 | -0.764 | -2.284 |
| FE5 | -1.484 | -0.660 | -2.292 |
| FE6 | 0.070 | 1.499 | -2.227 |
| FE7 | 0.000 | 0.000 | 0.000 |
| FE8 | -0.293 | -0.092 | -7.003 |
| S1A | -0.307 | -2.094 | -6.060 |
| S4A | 1.605 | 0.868 | -6.379 |
| S3A | 2.605 | -1.709 | -3.644 |
| S2A | -1.905 | 1.038 | -5.998 |
| S1B | -0.199 | -2.038 | -1.122 |
| S2B | -3.062 | -1.500 | -3.567 |
| S3B | -1.747 | 1.124 | -0.982 |
| S4B | 1.843 | 0.970 | -1.011 |
| S5 | 0.110 | 3.143 | -3.626 |
| N1 | 1.181 | -1.092 | 1.375 |
| H1 | 2.008 | -0.528 | 1.589 |
| H2 | 0.607 | -1.124 | 2.224 |
| H3 | 1.479 | -2.036 | 1.115 |
| O1 | -0.354 | 0.870 | 1.627 |
| H1 | -1.027 | 1.579 | 1.540 |
| S1 | -0.682 | -0.248 | -9.161 |
| H1 | 0.495 | 0.266 | -9.601 |
| H4 | 0.353 | 0.186 | -3.590 |

FeFeco 1OH and spin state A2, H in cluster (as in Fig. 5e)

| FE1 | -1.296 | -0.772 | -4.920 |
| --- | --- | --- | --- |
| FE2 | 0.134 | 1.407 | -4.977 |
| FE3 | 1.336 | -0.849 | -5.187 |
| FE4 | 1.097 | -0.771 | -2.465 |
| FE5 | -1.464 | -0.652 | -2.225 |
| FE6 | -0.010 | 1.520 | -2.234 |
| FE7 | 0.000 | 0.000 | 0.000 |
| FE8 | -0.179 | -0.017 | -7.231 |
| S1A | -0.119 | -2.098 | -6.319 |
| S4A | 1.758 | 0.899 | -6.496 |
| S3A | 2.668 | -1.642 | -3.742 |
| S2A | -1.805 | 1.064 | -6.157 |
| S1B | -0.209 | -2.043 | -1.061 |
| S2B | -2.898 | -1.426 | -3.591 |
| S3B | -1.784 | 1.099 | -0.881 |
| S4B | 1.808 | 0.923 | -1.107 |
| S5 | 0.122 | 3.131 | -3.642 |
| N1 | 1.265 | -1.003 | 1.390 |
| H1 | 2.027 | -0.355 | 1.611 |
| H2 | 0.684 | -1.103 | 2.229 |
| H3 | 1.660 | -1.909 | 1.124 |
| O1 | -0.403 | 0.839 | 1.647 |
| H1 | -1.092 | 1.533 | 1.590 |
| S1 | -0.544 | 0.062 | -9.441 |
| H1 | 0.706 | -0.328 | -9.801 |
| H4 | -0.222 | 0.099 | -3.542 |

FeMoco, H in cluster (as in Fig. 5e)

| FE1 | -1.262 | -0.631 | -4.823 |
| --- | --- | --- | --- |
| FE2 | 0.197 | 1.480 | -5.099 |
| FE3 | 1.410 | -1.122 | -5.186 |
| FE4 | 1.153 | -0.691 | -2.481 |
| FE5 | -1.583 | -0.693 | -2.141 |
| FE6 | 0.044 | 1.564 | -2.349 |
| MO1 | 0.000 | 0.000 | 0.000 |
| FE7 | -0.064 | -0.182 | -7.136 |
| S1 | -0.276 | -2.209 | -6.160 |
| S2 | 1.890 | 0.703 | -6.434 |
| S3 | 2.749 | -1.656 | -3.589 |
| S4 | -1.692 | 1.115 | -6.245 |
| S5 | -0.112 | -2.093 | -1.282 |
| S6 | -3.007 | -1.358 | -3.620 |
| S7 | -1.780 | 1.254 | -1.054 |
| S8 | 1.882 | 0.998 | -1.171 |
| S9 | 0.504 | 3.136 | -3.744 |
| N1 | 1.810 | -0.725 | 1.340 |
| H1 | 2.635 | -0.128 | 1.243 |
| H2 | 1.460 | -0.642 | 2.297 |
| H3 | 2.082 | -1.698 | 1.175 |
| O1 | -0.950 | -1.210 | 1.378 |
| H1 | -1.024 | -0.648 | 2.183 |
| O1 | -0.041 | 1.306 | 1.585 |
| H1 | -0.601 | 2.101 | 1.476 |
| S1 | -0.332 | -0.469 | -9.320 |
| H1 | 0.196 | 0.723 | -9.695 |
| H3 | -0.236 | 0.170 | -3.470 |

FeFeco 2OH and spin state A1, N2 on upper Fe (Fig. 6a)

| FE1 | -1.050 | -0.777 | -4.806 |
| --- | --- | --- | --- |
| FE2 | 0.396 | 1.390 | -5.059 |
| FE3 | 1.693 | -0.970 | -5.599 |
| FE4 | 0.986 | -0.702 | -2.904 |
| FE5 | -1.622 | -0.693 | -2.232 |
| FE6 | -0.028 | 1.592 | -2.397 |
| FE7 | 0.000 | 0.000 | 0.000 |
| FE8 | -0.201 | -0.044 | -7.200 |
| S1A | -0.090 | -2.091 | -6.245 |
| S4A | 1.735 | 1.013 | -6.775 |
| S3A | 2.841 | -1.295 | -3.809 |
| S2A | -1.659 | 1.026 | -5.893 |
| S1B | -0.047 | -2.001 | -1.427 |
| S2B | -2.867 | -1.407 | -3.864 |
| S3B | -1.768 | 1.179 | -1.027 |
| S4B | 1.733 | 0.810 | -1.304 |
| S5 | 0.392 | 3.164 | -3.798 |
| N1 | 1.494 | -0.951 | 1.182 |
| H1 | 2.353 | -0.397 | 1.234 |
| H2 | 1.059 | -0.990 | 2.108 |
| H3 | 1.714 | -1.902 | 0.875 |
| O1 | -1.228 | -1.021 | 1.045 |
| H1 | -1.508 | -0.408 | 1.761 |
| O1 | 0.117 | 1.296 | 1.356 |
| H1 | -0.413 | 2.091 | 1.131 |
| S1 | -0.656 | -0.300 | -9.379 |
| H1 | 0.427 | 0.375 | -9.841 |
| N2 | 2.913 | -1.706 | -6.925 |
| N3 | 3.547 | -2.071 | -7.785 |

FeFeco 2OH and spin state A2, N2 on upper Fe (as in Fig. 6a)

| FE1 | -1.056 | -0.773 | -4.895 |
| --- | --- | --- | --- |
| FE2 | 0.292 | 1.371 | -4.981 |
| FE3 | 1.642 | -0.861 | -5.753 |
| FE4 | 1.095 | -0.662 | -3.026 |
| FE5 | -1.316 | -0.709 | -2.223 |
| FE6 | 0.153 | 1.536 | -2.286 |
| FE7 | 0.000 | 0.000 | 0.000 |
| FE8 | -0.315 | 0.100 | -7.317 |
| S1A | -0.122 | -2.004 | -6.488 |
| S4A | 1.634 | 1.135 | -6.742 |
| S3A | 2.800 | -1.508 | -4.121 |
| S2A | -1.756 | 1.114 | -5.995 |
| S1B | 0.184 | -1.986 | -1.326 |
| S2B | -2.721 | -1.396 | -3.645 |
| S3B | -1.670 | 1.133 | -1.077 |
| S4B | 1.932 | 0.703 | -1.324 |
| S5 | 0.230 | 3.124 | -3.701 |
| N1 | 1.360 | -0.861 | 1.369 |
| H1 | 1.788 | -0.062 | 1.849 |
| H2 | 0.725 | -1.352 | 2.009 |
| H3 | 2.081 | -1.495 | 1.017 |
| O1 | -1.278 | -0.884 | 1.108 |
| H1 | -1.944 | -0.231 | 1.417 |
| O1 | 0.260 | 1.466 | 1.166 |
| H1 | -0.140 | 2.296 | 0.831 |
| S1 | -0.869 | 0.058 | -9.497 |
| H1 | 0.291 | -0.465 | -9.968 |
| N2 | 2.758 | -1.534 | -7.095 |
| N3 | 3.413 | -1.922 | -7.932 |

FeFeco 1OH and spin state A1, N2 on upper Fe (as in Fig. 6a)

| FE1 | -1.122 | -0.917 | -4.606 |
| --- | --- | --- | --- |
| FE2 | 0.259 | 1.340 | -4.770 |
| FE3 | 1.599 | -1.044 | -5.331 |
| FE4 | 0.935 | -0.655 | -2.592 |
| FE5 | -1.734 | -0.677 | -2.070 |
| FE6 | -0.074 | 1.665 | -2.103 |
| FE7 | 0.000 | 0.000 | 0.000 |
| FE8 | -0.268 | -0.051 | -6.962 |
| S1A | -0.159 | -2.161 | -6.127 |
| S4A | 1.661 | 0.981 | -6.448 |
| S3A | 2.696 | -1.474 | -3.526 |
| S2A | -1.768 | 0.930 | -5.620 |
| S1B | -0.189 | -2.013 | -1.237 |
| S2B | -2.936 | -1.581 | -3.650 |
| S3B | -1.857 | 1.169 | -0.852 |
| S4B | 1.737 | 0.942 | -1.127 |
| S5 | 0.205 | 3.177 | -3.591 |
| N1 | 1.181 | -1.092 | 1.375 |
| H1 | 2.008 | -0.528 | 1.589 |
| H2 | 0.607 | -1.124 | 2.224 |
| H3 | 1.479 | -2.036 | 1.115 |
| O1 | -0.354 | 0.870 | 1.627 |
| H1 | -1.027 | 1.579 | 1.540 |
| S1 | -0.682 | -0.248 | -9.161 |
| H1 | 0.495 | 0.266 | -9.601 |
| N2 | 2.923 | -1.798 | -6.669 |
| N3 | 3.638 | -2.223 | -7.430 |

FeFeco 1OH and spin state A2, N2 on upper Fe (as in Fig. 6a)

| FE1 | -1.194 | -0.782 | -4.812 |
| --- | --- | --- | --- |
| FE2 | 0.143 | 1.378 | -4.876 |
| FE3 | 1.564 | -0.964 | -5.508 |
| FE4 | 0.984 | -0.666 | -2.690 |
| FE5 | -1.516 | -0.623 | -2.151 |
| FE6 | -0.064 | 1.586 | -2.184 |
| FE7 | 0.000 | 0.000 | 0.000 |
| FE8 | -0.258 | 0.043 | -7.202 |
| S1A | -0.193 | -2.061 | -6.333 |
| S4A | 1.648 | 1.048 | -6.485 |
| S3A | 2.619 | -1.590 | -3.813 |
| S2A | -1.825 | 1.068 | -6.022 |
| S1B | -0.135 | -2.015 | -1.171 |
| S2B | -2.909 | -1.316 | -3.587 |
| S3B | -1.801 | 1.134 | -0.818 |
| S4B | 1.800 | 0.904 | -1.224 |
| S5 | -0.040 | 3.147 | -3.633 |
| N1 | 1.265 | -1.003 | 1.390 |
| H1 | 2.027 | -0.355 | 1.611 |
| H2 | 0.684 | -1.103 | 2.229 |
| H3 | 1.660 | -1.909 | 1.124 |
| O1 | -0.403 | 0.839 | 1.647 |
| H1 | -1.092 | 1.533 | 1.590 |
| S1 | -0.544 | 0.062 | -9.441 |
| H1 | 0.706 | -0.328 | -9.801 |
| N2 | 2.724 | -1.675 | -6.788 |
| N3 | 3.419 | -2.098 | -7.575 |

FeMoco, N2 on upper Fe (as in Fig. 6a)

| FE1 | -1.144 | -0.522 | -4.683 |
| --- | --- | --- | --- |
| FE2 | 0.331 | 1.518 | -5.090 |
| FE3 | 1.623 | -1.057 | -5.301 |
| FE4 | 0.912 | -0.737 | -2.670 |
| FE5 | -1.692 | -0.724 | -2.028 |
| FE6 | -0.135 | 1.531 | -2.391 |
| MO1 | 0.000 | 0.000 | 0.000 |
| FE7 | -0.121 | -0.094 | -7.113 |
| S1 | -0.240 | -2.061 | -6.022 |
| S2 | 1.862 | 0.833 | -6.541 |
| S3 | 2.737 | -1.535 | -3.563 |
| S4 | -1.649 | 1.187 | -6.072 |
| S5 | -0.176 | -2.117 | -1.263 |
| S6 | -2.973 | -1.259 | -3.642 |
| S7 | -1.865 | 1.219 | -0.975 |
| S8 | 1.799 | 0.937 | -1.283 |
| S9 | 0.475 | 3.144 | -3.698 |
| N1 | 1.810 | -0.725 | 1.340 |
| H1 | 2.635 | -0.128 | 1.243 |
| H2 | 1.460 | -0.642 | 2.297 |
| H3 | 2.082 | -1.698 | 1.175 |
| O1 | -0.950 | -1.210 | 1.378 |
| H1 | -1.024 | -0.648 | 2.183 |
| O1 | -0.041 | 1.306 | 1.585 |
| H1 | -0.601 | 2.101 | 1.476 |
| S1 | -0.332 | -0.469 | -9.320 |
| H1 | 0.196 | 0.723 | -9.695 |
| N2 | 2.835 | -2.041 | -6.673 |
| N3 | 3.476 | -2.527 | -7.461 |

FeFeco 2OH and spin state A1, N2 on lower Fe (Fig. 6b)

| FE1 | -1.037 | -0.699 | -4.824 |
| --- | --- | --- | --- |
| FE2 | 0.460 | 1.480 | -5.272 |
| FE3 | 1.580 | -0.824 | -5.466 |
| FE4 | 1.011 | -0.770 | -2.823 |
| FE5 | -1.792 | -0.812 | -2.109 |
| FE6 | -0.015 | 1.518 | -2.500 |
| FE7 | 0.000 | 0.000 | 0.000 |
| FE8 | -0.075 | -0.083 | -7.255 |
| S1A | -0.084 | -2.076 | -6.251 |
| S4A | 1.924 | 0.885 | -6.866 |
| S3A | 2.861 | -1.357 | -3.838 |
| S2A | -1.578 | 1.020 | -6.059 |
| S1B | -0.087 | -2.033 | -1.406 |
| S2B | -2.774 | -1.488 | -3.965 |
| S3B | -1.706 | 1.193 | -1.105 |
| S4B | 1.715 | 0.811 | -1.275 |
| S5 | 0.529 | 3.105 | -3.848 |
| N1 | 1.494 | -0.951 | 1.182 |
| H1 | 2.353 | -0.397 | 1.234 |
| H2 | 1.059 | -0.990 | 2.108 |
| H3 | 1.714 | -1.902 | 0.875 |
| O1 | -1.228 | -1.021 | 1.045 |
| H1 | -1.508 | -0.408 | 1.761 |
| O1 | 0.117 | 1.296 | 1.356 |
| H1 | -0.413 | 2.091 | 1.131 |
| S1 | -0.656 | -0.300 | -9.379 |
| H1 | 0.427 | 0.375 | -9.841 |
| N2 | -3.285 | -1.475 | -1.029 |
| N3 | -4.159 | -1.818 | -0.406 |

FeFeco 2OH and spin state A2, N2 on lower Fe (as in Fig. 6b)

| FE1 | -0.958 | -0.574 | -4.787 |
| --- | --- | --- | --- |
| FE2 | 0.398 | 1.598 | -5.219 |
| FE3 | 1.506 | -0.672 | -5.471 |
| FE4 | 1.048 | -0.931 | -2.895 |
| FE5 | -1.547 | -0.962 | -2.059 |
| FE6 | 0.116 | 1.319 | -2.473 |
| FE7 | 0.000 | 0.000 | 0.000 |
| FE8 | -0.234 | 0.105 | -7.336 |
| S1A | -0.052 | -1.951 | -6.351 |
| S4A | 1.815 | 1.009 | -6.911 |
| S3A | 2.829 | -1.492 | -4.039 |
| S2A | -1.680 | 1.211 | -6.045 |
| S1B | 0.129 | -2.127 | -1.247 |
| S2B | -2.655 | -1.429 | -3.771 |
| S3B | -1.653 | 1.085 | -1.177 |
| S4B | 1.850 | 0.628 | -1.312 |
| S5 | 0.524 | 3.073 | -3.637 |
| N1 | 1.360 | -0.861 | 1.369 |
| H1 | 1.788 | -0.062 | 1.849 |
| H2 | 0.725 | -1.352 | 2.009 |
| H3 | 2.081 | -1.495 | 1.017 |
| O1 | -1.278 | -0.884 | 1.108 |
| H1 | -1.944 | -0.231 | 1.417 |
| O1 | 0.260 | 1.466 | 1.166 |
| H1 | -0.140 | 2.296 | 0.831 |
| S1 | -0.869 | 0.058 | -9.497 |
| H1 | 0.291 | -0.465 | -9.968 |
| N2 | -2.923 | -1.728 | -0.917 |
| N3 | -3.808 | -2.195 | -0.395 |

FeFeco 1OH and spin state A1, N2 on lower Fe (as in Fig. 6b)

| FE1 | -1.140 | -0.755 | -4.586 |
| --- | --- | --- | --- |
| FE2 | 0.328 | 1.458 | -5.034 |
| FE3 | 1.462 | -0.828 | -5.174 |
| FE4 | 0.990 | -0.778 | -2.476 |
| FE5 | -1.894 | -0.818 | -1.840 |
| FE6 | -0.012 | 1.499 | -2.278 |
| FE7 | 0.000 | 0.000 | 0.000 |
| FE8 | -0.163 | -0.120 | -7.008 |
| S1A | -0.165 | -2.106 | -6.018 |
| S4A | 1.817 | 0.862 | -6.591 |
| S3A | 2.722 | -1.518 | -3.590 |
| S2A | -1.694 | 0.958 | -5.826 |
| S1B | -0.201 | -2.068 | -1.158 |
| S2B | -2.830 | -1.599 | -3.679 |
| S3B | -1.737 | 1.219 | -0.947 |
| S4B | 1.753 | 0.890 | -1.103 |
| S5 | 0.413 | 3.108 | -3.643 |
| N1 | 1.181 | -1.092 | 1.375 |
| H1 | 2.008 | -0.528 | 1.589 |
| H2 | 0.607 | -1.124 | 2.224 |
| H3 | 1.479 | -2.036 | 1.115 |
| O1 | -0.354 | 0.870 | 1.627 |
| H1 | -1.027 | 1.579 | 1.540 |
| S1 | -0.682 | -0.248 | -9.161 |
| H1 | 0.495 | 0.266 | -9.601 |
| N2 | -3.298 | -1.369 | -0.602 |
| N3 | -4.031 | -1.625 | 0.221 |

FeFeco 1OH and spin state A2, N2 on lower Fe (as in Fig. 6b)

| FE1 | -1.147 | -0.636 | -4.694 |
| --- | --- | --- | --- |
| FE2 | 0.281 | 1.524 | -5.064 |
| FE3 | 1.404 | -0.761 | -5.200 |
| FE4 | 0.934 | -0.843 | -2.553 |
| FE5 | -1.812 | -0.860 | -1.842 |
| FE6 | -0.046 | 1.436 | -2.328 |
| FE7 | 0.000 | 0.000 | 0.000 |
| FE8 | -0.174 | -0.004 | -7.204 |
| S1A | -0.137 | -2.049 | -6.154 |
| S4A | 1.820 | 0.922 | -6.631 |
| S3A | 2.679 | -1.526 | -3.686 |
| S2A | -1.738 | 1.113 | -6.038 |
| S1B | -0.166 | -2.091 | -1.058 |
| S2B | -2.855 | -1.351 | -3.580 |
| S3B | -1.734 | 1.172 | -0.923 |
| S4B | 1.761 | 0.850 | -1.189 |
| S5 | 0.294 | 3.125 | -3.610 |
| N1 | 1.265 | -1.003 | 1.390 |
| H1 | 2.027 | -0.355 | 1.611 |
| H2 | 0.684 | -1.103 | 2.229 |
| H3 | 1.660 | -1.909 | 1.124 |
| O1 | -0.403 | 0.839 | 1.647 |
| H1 | -1.092 | 1.533 | 1.590 |
| S1 | -0.544 | 0.062 | -9.441 |
| H1 | 0.706 | -0.328 | -9.801 |
| N2 | -3.056 | -1.452 | -0.566 |
| N3 | -3.804 | -1.791 | 0.214 |

FeMoco, N2 on lower Fe (as in Fig. 6b)

| FE1 | -1.054 | -0.463 | -4.647 |
| --- | --- | --- | --- |
| FE2 | 0.381 | 1.566 | -5.189 |
| FE3 | 1.455 | -1.012 | -5.131 |
| FE4 | 1.030 | -0.787 | -2.537 |
| FE5 | -1.777 | -0.747 | -1.984 |
| FE6 | -0.129 | 1.434 | -2.530 |
| MO1 | 0.000 | 0.000 | 0.000 |
| FE7 | -0.045 | -0.174 | -7.121 |
| S1 | -0.258 | -2.126 | -6.016 |
| S2 | 1.985 | 0.684 | -6.538 |
| S3 | 2.711 | -1.712 | -3.549 |
| S4 | -1.593 | 1.166 | -6.151 |
| S5 | -0.179 | -2.096 | -1.252 |
| S6 | -2.880 | -1.175 | -3.694 |
| S7 | -1.776 | 1.276 | -1.006 |
| S8 | 1.827 | 0.927 | -1.273 |
| S9 | 0.484 | 3.132 | -3.733 |
| N1 | 1.810 | -0.725 | 1.340 |
| H1 | 2.635 | -0.128 | 1.243 |
| H2 | 1.460 | -0.642 | 2.297 |
| H3 | 2.082 | -1.698 | 1.175 |
| O1 | -0.950 | -1.210 | 1.378 |
| H1 | -1.024 | -0.648 | 2.183 |
| O1 | -0.041 | 1.306 | 1.585 |
| H1 | -0.601 | 2.101 | 1.476 |
| S1 | -0.332 | -0.469 | -9.320 |
| H1 | 0.196 | 0.723 | -9.695 |
| N2 | -3.051 | -1.324 | -0.719 |
| N3 | -3.808 | -1.621 | 0.066 |

FeFeco 1OH and spin state A1, N2 on top Fe (Fig. 6c)

| FE1 | -1.048 | -1.008 | -4.678 |
| --- | --- | --- | --- |
| FE2 | 0.355 | 1.324 | -4.934 |
| FE3 | 1.606 | -0.972 | -5.350 |
| FE4 | 1.122 | -0.762 | -2.703 |
| FE5 | -1.628 | -0.812 | -2.128 |
| FE6 | 0.045 | 1.533 | -2.234 |
| FE7 | 0.000 | 0.000 | 0.000 |
| FE8 | -0.161 | -0.131 | -7.015 |
| S1A | -0.015 | -2.228 | -6.216 |
| S4A | 1.803 | 0.876 | -6.598 |
| S3A | 2.904 | -1.498 | -3.736 |
| S2A | -1.674 | 0.867 | -5.684 |
| S1B | -0.004 | -2.022 | -1.273 |
| S2B | -2.789 | -1.802 | -3.683 |
| S3B | -1.805 | 1.122 | -1.071 |
| S4B | 1.817 | 0.836 | -1.162 |
| S5 | 0.507 | 3.072 | -3.639 |
| N1 | 1.360 | -0.994 | 1.273 |
| H1 | 2.122 | -0.415 | 1.637 |
| H2 | 0.716 | -1.272 | 2.025 |
| H3 | 1.765 | -1.835 | 0.856 |
| O1 | -1.258 | -0.932 | 1.183 |
| H1 | -1.917 | -0.305 | 1.551 |
| S1 | -0.682 | -0.248 | -9.161 |
| H1 | 0.495 | 0.266 | -9.601 |
| N2 | 0.047 | 1.466 | 1.170 |
| N3 | 0.075 | 2.319 | 1.914 |

FeFeco 1OH and spin state A2, N2 on top Fe (as in Fig. 6c)

| FE1 | -0.968 | -0.815 | -4.775 |
| --- | --- | --- | --- |
| FE2 | 0.365 | 1.437 | -5.074 |
| FE3 | 1.553 | -0.802 | -5.352 |
| FE4 | 1.146 | -0.882 | -2.753 |
| FE5 | -1.308 | -0.883 | -2.149 |
| FE6 | 0.200 | 1.334 | -2.328 |
| FE7 | 0.000 | 0.000 | 0.000 |
| FE8 | -0.107 | 0.003 | -7.243 |
| S1A | 0.066 | -2.087 | -6.345 |
| S4A | 1.886 | 0.927 | -6.703 |
| S3A | 2.893 | -1.560 | -3.911 |
| S2A | -1.656 | 1.025 | -6.010 |
| S1B | 0.139 | -2.110 | -1.126 |
| S2B | -2.658 | -1.578 | -3.591 |
| S3B | -1.655 | 1.011 | -1.216 |
| S4B | 1.906 | 0.709 | -1.144 |
| S5 | 0.613 | 2.999 | -3.577 |
| N1 | 1.279 | -0.916 | 1.405 |
| H1 | 1.935 | -0.288 | 1.878 |
| H2 | 0.558 | -1.256 | 2.059 |
| H3 | 1.802 | -1.708 | 1.027 |
| O1 | -1.316 | -0.896 | 1.155 |
| H1 | -2.028 | -0.283 | 1.439 |
| S1 | -0.544 | 0.062 | -9.441 |
| H1 | 0.706 | -0.328 | -9.801 |
| N2 | 0.024 | 1.508 | 1.113 |
| N3 | 0.045 | 2.377 | 1.838 |

FeMoco 1OH, N2 on top Mo (as in Fig. 6c)

| FE1 | -1.129 | -0.626 | -4.602 |
| --- | --- | --- | --- |
| FE2 | 0.159 | 1.626 | -5.084 |
| FE3 | 1.459 | -1.060 | -5.003 |
| FE4 | 1.052 | -1.013 | -2.301 |
| FE5 | -1.695 | -0.955 | -2.020 |
| FE6 | -0.189 | 1.300 | -2.420 |
| MO1 | -0.110 | -0.022 | -0.045 |
| FE7 | -0.003 | -0.171 | -6.974 |
| S1 | -0.169 | -2.187 | -6.002 |
| S2 | 1.930 | 0.785 | -6.241 |
| S3 | 2.686 | -1.879 | -3.437 |
| S4 | -1.707 | 1.036 | -6.104 |
| S5 | -0.247 | -2.290 | -1.023 |
| S6 | -2.947 | -1.544 | -3.645 |
| S7 | -2.021 | 1.030 | -1.148 |
| S8 | 1.751 | 0.877 | -1.316 |
| S9 | 0.222 | 3.122 | -3.547 |
| N1 | 1.553 | -0.852 | 1.421 |
| H1 | 2.425 | -0.317 | 1.470 |
| H2 | 1.091 | -0.851 | 2.337 |
| H3 | 1.788 | -1.822 | 1.195 |
| O1 | -1.207 | -0.766 | 1.584 |
| H1 | -1.805 | -0.135 | 2.034 |
| S1 | -0.203 | -0.493 | -9.175 |
| H1 | 0.066 | 0.785 | -9.533 |
| N2 | -0.051 | 1.645 | 1.082 |
| N3 | -0.071 | 2.553 | 1.761 |

FeMoco 1OH (for binding energy calculation to Fig. 6c)

| FE1 | -1.123 | -0.612 | -4.534 |
| --- | --- | --- | --- |
| FE2 | 0.177 | 1.600 | -5.027 |
| FE3 | 1.448 | -1.124 | -5.021 |
| FE4 | 0.957 | -1.039 | -2.371 |
| FE5 | -1.743 | -0.788 | -1.900 |
| FE6 | -0.131 | 1.397 | -2.279 |
| MO1 | 0.000 | 0.000 | 0.000 |
| FE7 | -0.039 | -0.172 | -6.959 |
| S1 | -0.235 | -2.187 | -5.983 |
| S2 | 1.918 | 0.741 | -6.220 |
| S3 | 2.609 | -1.989 | -3.440 |
| S4 | -1.707 | 1.052 | -6.058 |
| S5 | -0.333 | -2.184 | -0.903 |
| S6 | -2.962 | -1.427 | -3.544 |
| S7 | -1.896 | 1.201 | -0.927 |
| S8 | 1.781 | 0.813 | -1.277 |
| S9 | 0.239 | 3.137 | -3.518 |
| N1 | 1.605 | -0.905 | 1.464 |
| H1 | 2.458 | -0.339 | 1.435 |
| H2 | 1.196 | -0.795 | 2.399 |
| H3 | 1.870 | -1.883 | 1.316 |
| O1 | -0.359 | 0.821 | 1.820 |
| H1 | -1.043 | 1.521 | 1.864 |
| S1 | -0.203 | -0.493 | -9.175 |
| H1 | 0.066 | 0.785 | -9.533 |

FeFeco 2OH and spin state A1, N2H on upper Fe (Fig. 7a)

| FE1 | -1.062 | -0.855 | -4.830 |
| --- | --- | --- | --- |
| FE2 | 0.356 | 1.435 | -5.009 |
| FE3 | 1.777 | -1.122 | -5.821 |
| FE4 | 0.946 | -0.603 | -2.967 |
| FE5 | -1.625 | -0.627 | -2.291 |
| FE6 | -0.051 | 1.695 | -2.368 |
| FE7 | 0.000 | 0.000 | 0.000 |
| FE8 | -0.217 | 0.014 | -7.190 |
| S1A | -0.139 | -2.112 | -6.396 |
| S4A | 1.730 | 1.003 | -6.726 |
| S3A | 2.711 | -1.385 | -3.889 |
| S2A | -1.685 | 1.020 | -5.830 |
| S1B | -0.039 | -1.940 | -1.489 |
| S2B | -2.846 | -1.545 | -3.828 |
| S3B | -1.780 | 1.191 | -1.015 |
| S4B | 1.710 | 0.863 | -1.327 |
| S5 | 0.377 | 3.236 | -3.798 |
| N1 | 1.494 | -0.951 | 1.182 |
| H1 | 2.353 | -0.397 | 1.234 |
| H2 | 1.059 | -0.990 | 2.108 |
| H3 | 1.714 | -1.902 | 0.875 |
| O1 | -1.228 | -1.021 | 1.045 |
| H1 | -1.508 | -0.408 | 1.761 |
| O1 | 0.117 | 1.296 | 1.356 |
| H1 | -0.413 | 2.091 | 1.131 |
| S1 | -0.656 | -0.300 | -9.379 |
| H1 | 0.427 | 0.375 | -9.841 |
| N2 | 2.918 | -1.770 | -6.943 |
| N3 | 3.569 | -2.253 | -7.828 |
| H4 | 4.604 | -2.244 | -7.773 |

FeFeco 2OH and spin state A2, N2H on upper Fe (as in Fig. 7a)

| FE1 | -1.080 | -0.847 | -4.900 |
| --- | --- | --- | --- |
| FE2 | 0.293 | 1.291 | -5.010 |
| FE3 | 1.710 | -1.067 | -6.048 |
| FE4 | 1.118 | -0.627 | -2.884 |
| FE5 | -1.281 | -0.703 | -2.245 |
| FE6 | 0.167 | 1.567 | -2.310 |
| FE7 | 0.000 | 0.000 | 0.000 |
| FE8 | -0.329 | 0.024 | -7.321 |
| S1A | -0.210 | -2.114 | -6.522 |
| S4A | 1.632 | 1.042 | -6.807 |
| S3A | 2.652 | -1.391 | -4.163 |
| S2A | -1.771 | 1.033 | -6.003 |
| S1B | 0.215 | -1.976 | -1.275 |
| S2B | -2.723 | -1.429 | -3.609 |
| S3B | -1.644 | 1.135 | -1.088 |
| S4B | 1.954 | 0.768 | -1.303 |
| S5 | 0.197 | 3.090 | -3.792 |
| N1 | 1.360 | -0.861 | 1.369 |
| H1 | 1.788 | -0.062 | 1.849 |
| H2 | 0.725 | -1.352 | 2.009 |
| H3 | 2.081 | -1.495 | 1.017 |
| O1 | -1.278 | -0.884 | 1.108 |
| H1 | -1.944 | -0.231 | 1.417 |
| O1 | 0.260 | 1.466 | 1.166 |
| H1 | -0.140 | 2.296 | 0.831 |
| S1 | -0.869 | 0.058 | -9.497 |
| H1 | 0.291 | -0.465 | -9.968 |
| N2 | 2.847 | -1.763 | -7.089 |
| N3 | 3.621 | -2.306 | -7.830 |
| H4 | 4.549 | -1.875 | -7.999 |

FeFeco 1OH and spin state A1, N2H on upper Fe (as in Fig. 7a)

| FE1 | -1.066 | -1.019 | -4.626 |
| --- | --- | --- | --- |
| FE2 | 0.263 | 1.316 | -4.709 |
| FE3 | 1.758 | -1.196 | -5.522 |
| FE4 | 0.936 | -0.629 | -2.624 |
| FE5 | -1.680 | -0.624 | -2.146 |
| FE6 | -0.060 | 1.685 | -2.092 |
| FE7 | 0.000 | 0.000 | 0.000 |
| FE8 | -0.201 | -0.079 | -6.956 |
| S1A | -0.098 | -2.233 | -6.193 |
| S4A | 1.705 | 0.937 | -6.393 |
| S3A | 2.657 | -1.487 | -3.566 |
| S2A | -1.731 | 0.847 | -5.611 |
| S1B | -0.181 | -1.985 | -1.273 |
| S2B | -2.886 | -1.650 | -3.634 |
| S3B | -1.843 | 1.166 | -0.853 |
| S4B | 1.752 | 0.939 | -1.147 |
| S5 | 0.159 | 3.185 | -3.606 |
| N1 | 1.181 | -1.092 | 1.375 |
| H1 | 2.008 | -0.528 | 1.589 |
| H2 | 0.607 | -1.124 | 2.224 |
| H3 | 1.479 | -2.036 | 1.115 |
| O1 | -0.354 | 0.870 | 1.627 |
| H1 | -1.027 | 1.579 | 1.540 |
| S1 | -0.682 | -0.248 | -9.161 |
| H1 | 0.495 | 0.266 | -9.601 |
| N2 | 2.891 | -1.830 | -6.665 |
| N3 | 3.383 | -2.308 | -7.651 |
| H4 | 4.409 | -2.467 | -7.685 |

FeFeco 1OH and spin state A2, N2H on upper Fe (as in Fig. 7a)

| FE1 | -1.225 | -0.781 | -4.816 |
| --- | --- | --- | --- |
| FE2 | 0.144 | 1.379 | -4.871 |
| FE3 | 1.653 | -1.073 | -5.727 |
| FE4 | 0.978 | -0.594 | -2.598 |
| FE5 | -1.525 | -0.595 | -2.144 |
| FE6 | -0.085 | 1.624 | -2.168 |
| FE7 | 0.000 | 0.000 | 0.000 |
| FE8 | -0.250 | 0.044 | -7.197 |
| S1A | -0.251 | -2.089 | -6.359 |
| S4A | 1.660 | 1.058 | -6.500 |
| S3A | 2.438 | -1.599 | -3.810 |
| S2A | -1.819 | 1.071 | -6.030 |
| S1B | -0.141 | -1.990 | -1.161 |
| S2B | -2.924 | -1.306 | -3.566 |
| S3B | -1.818 | 1.149 | -0.800 |
| S4B | 1.791 | 0.984 | -1.192 |
| S5 | -0.084 | 3.156 | -3.646 |
| N1 | 1.265 | -1.003 | 1.390 |
| H1 | 2.027 | -0.355 | 1.611 |
| H2 | 0.684 | -1.103 | 2.229 |
| H3 | 1.660 | -1.909 | 1.124 |
| O1 | -0.403 | 0.839 | 1.647 |
| H1 | -1.092 | 1.533 | 1.590 |
| S1 | -0.544 | 0.062 | -9.441 |
| H1 | 0.706 | -0.328 | -9.801 |
| N2 | 2.777 | -1.733 | -6.810 |
| N3 | 3.412 | -2.290 | -7.663 |
| H4 | 4.437 | -2.161 | -7.720 |

FeMoco, N2H on upper Fe (as in Fig. 7a)

| FE1 | -1.116 | -0.556 | -4.614 |
| --- | --- | --- | --- |
| FE2 | 0.268 | 1.505 | -5.058 |
| FE3 | 1.785 | -1.133 | -5.519 |
| FE4 | 1.005 | -0.597 | -2.672 |
| FE5 | -1.513 | -0.625 | -2.115 |
| FE6 | -0.133 | 1.629 | -2.383 |
| MO1 | 0.000 | 0.000 | 0.000 |
| FE7 | -0.160 | -0.138 | -7.086 |
| S1 | -0.193 | -2.108 | -5.953 |
| S2 | 1.793 | 0.894 | -6.580 |
| S3 | 2.748 | -1.444 | -3.615 |
| S4 | -1.708 | 1.114 | -6.046 |
| S5 | -0.067 | -2.069 | -1.346 |
| S6 | -2.994 | -1.044 | -3.574 |
| S7 | -1.850 | 1.238 | -0.968 |
| S8 | 1.804 | 1.039 | -1.274 |
| S9 | 0.314 | 3.224 | -3.763 |
| N1 | 1.810 | -0.725 | 1.340 |
| H1 | 2.635 | -0.128 | 1.243 |
| H2 | 1.460 | -0.642 | 2.297 |
| H3 | 2.082 | -1.698 | 1.175 |
| O1 | -0.950 | -1.210 | 1.378 |
| H1 | -1.024 | -0.648 | 2.183 |
| O1 | -0.041 | 1.306 | 1.585 |
| H1 | -0.601 | 2.101 | 1.476 |
| S1 | -0.332 | -0.469 | -9.320 |
| H1 | 0.196 | 0.723 | -9.695 |
| N2 | 2.877 | -1.932 | -6.570 |
| N3 | 3.559 | -2.558 | -7.330 |
| H3 | 4.543 | -2.284 | -7.499 |

FeFeco 2OH and spin state A1, N2H on lower Fe (Fig. 7b)

| FE1 | -0.988 | -0.583 | -4.792 |
| --- | --- | --- | --- |
| FE2 | 0.515 | 1.564 | -5.344 |
| FE3 | 1.614 | -0.743 | -5.449 |
| FE4 | 1.033 | -0.854 | -2.784 |
| FE5 | -1.982 | -0.888 | -2.020 |
| FE6 | 0.047 | 1.437 | -2.600 |
| FE7 | 0.000 | 0.000 | 0.000 |
| FE8 | -0.068 | -0.065 | -7.250 |
| S1A | -0.050 | -2.009 | -6.167 |
| S4A | 1.950 | 0.903 | -6.924 |
| S3A | 2.866 | -1.402 | -3.842 |
| S2A | -1.530 | 1.107 | -6.065 |
| S1B | -0.179 | -2.053 | -1.394 |
| S2B | -2.773 | -1.373 | -4.013 |
| S3B | -1.653 | 1.184 | -1.170 |
| S4B | 1.744 | 0.759 | -1.278 |
| S5 | 0.697 | 3.090 | -3.844 |
| N1 | 1.494 | -0.951 | 1.182 |
| H1 | 2.353 | -0.397 | 1.234 |
| H2 | 1.059 | -0.990 | 2.108 |
| H3 | 1.714 | -1.902 | 0.875 |
| O1 | -1.228 | -1.021 | 1.045 |
| H1 | -1.508 | -0.408 | 1.761 |
| O1 | 0.117 | 1.296 | 1.356 |
| H1 | -0.413 | 2.091 | 1.131 |
| S1 | -0.656 | -0.300 | -9.379 |
| H1 | 0.427 | 0.375 | -9.841 |
| N2 | -3.411 | -1.237 | -1.107 |
| N3 | -4.428 | -1.243 | -0.471 |
| H4 | -5.000 | -0.375 | -0.433 |

FeFeco 2OH and spin state A2, N2H on lower Fe (as in Fig. 7b)

| FE1 | -1.048 | -0.506 | -4.686 |
| --- | --- | --- | --- |
| FE2 | 0.433 | 1.575 | -5.234 |
| FE3 | 1.421 | -0.717 | -5.506 |
| FE4 | 1.000 | -1.060 | -2.940 |
| FE5 | -1.942 | -0.926 | -1.918 |
| FE6 | 0.078 | 1.246 | -2.535 |
| FE7 | 0.000 | 0.000 | 0.000 |
| FE8 | -0.312 | 0.114 | -7.320 |
| S1A | -0.245 | -1.921 | -6.276 |
| S4A | 1.788 | 0.940 | -6.948 |
| S3A | 2.777 | -1.584 | -4.126 |
| S2A | -1.683 | 1.292 | -5.989 |
| S1B | -0.144 | -2.138 | -1.328 |
| S2B | -2.781 | -1.377 | -3.818 |
| S3B | -1.652 | 1.179 | -1.139 |
| S4B | 1.804 | 0.482 | -1.367 |
| S5 | 0.602 | 3.018 | -3.636 |
| N1 | 1.360 | -0.861 | 1.369 |
| H1 | 1.788 | -0.062 | 1.849 |
| H2 | 0.725 | -1.352 | 2.009 |
| H3 | 2.081 | -1.495 | 1.017 |
| O1 | -1.278 | -0.884 | 1.108 |
| H1 | -1.944 | -0.231 | 1.417 |
| O1 | 0.260 | 1.466 | 1.166 |
| H1 | -0.140 | 2.296 | 0.831 |
| S1 | -0.869 | 0.058 | -9.497 |
| H1 | 0.291 | -0.465 | -9.968 |
| N2 | -3.329 | -1.235 | -0.891 |
| N3 | -4.401 | -1.183 | -0.356 |
| H4 | -5.074 | -0.428 | -0.610 |

FeFeco 1OH and spin state A1, N2H on lower Fe (as in Fig. 7b)

| FE1 | -1.210 | -0.420 | -4.575 |
| --- | --- | --- | --- |
| FE2 | 0.552 | 1.500 | -5.099 |
| FE3 | 1.352 | -0.932 | -5.143 |
| FE4 | 0.880 | -0.968 | -2.427 |
| FE5 | -2.135 | -0.679 | -1.742 |
| FE6 | 0.142 | 1.409 | -2.346 |
| FE7 | 0.000 | 0.000 | 0.000 |
| FE8 | -0.167 | -0.060 | -7.004 |
| S1A | -0.447 | -1.963 | -5.917 |
| S4A | 1.939 | 0.643 | -6.615 |
| S3A | 2.505 | -1.855 | -3.603 |
| S2A | -1.514 | 1.284 | -5.893 |
| S1B | -0.497 | -2.045 | -1.071 |
| S2B | -3.047 | -0.972 | -3.726 |
| S3B | -1.595 | 1.358 | -0.978 |
| S4B | 1.845 | 0.660 | -1.132 |
| S5 | 0.811 | 3.030 | -3.620 |
| N1 | 1.181 | -1.092 | 1.375 |
| H1 | 2.008 | -0.528 | 1.589 |
| H2 | 0.607 | -1.124 | 2.224 |
| H3 | 1.479 | -2.036 | 1.115 |
| O1 | -0.354 | 0.870 | 1.627 |
| H1 | -1.027 | 1.579 | 1.540 |
| S1 | -0.682 | -0.248 | -9.161 |
| H1 | 0.495 | 0.266 | -9.601 |
| N2 | -3.533 | -0.937 | -0.781 |
| N3 | -4.502 | -0.957 | -0.068 |
| H4 | -5.073 | -0.092 | 0.012 |

FeFeco 1OH and spin state A2, N2H on lower Fe (as in Fig. 7b)

| FE1 | -1.085 | -0.515 | -4.721 |
| --- | --- | --- | --- |
| FE2 | 0.327 | 1.569 | -5.067 |
| FE3 | 1.415 | -0.771 | -5.193 |
| FE4 | 0.916 | -0.888 | -2.535 |
| FE5 | -1.973 | -0.912 | -1.640 |
| FE6 | -0.041 | 1.412 | -2.364 |
| FE7 | 0.000 | 0.000 | 0.000 |
| FE8 | -0.160 | 0.051 | -7.213 |
| S1A | -0.148 | -1.985 | -6.174 |
| S4A | 1.869 | 0.893 | -6.608 |
| S3A | 2.677 | -1.530 | -3.675 |
| S2A | -1.689 | 1.230 | -6.046 |
| S1B | -0.228 | -2.111 | -1.038 |
| S2B | -2.695 | -1.356 | -3.587 |
| S3B | -1.734 | 1.186 | -0.915 |
| S4B | 1.742 | 0.819 | -1.200 |
| S5 | 0.362 | 3.137 | -3.581 |
| N1 | 1.265 | -1.003 | 1.390 |
| H1 | 2.027 | -0.355 | 1.611 |
| H2 | 0.684 | -1.103 | 2.229 |
| H3 | 1.660 | -1.909 | 1.124 |
| O1 | -0.403 | 0.839 | 1.647 |
| H1 | -1.092 | 1.533 | 1.590 |
| S1 | -0.544 | 0.062 | -9.441 |
| H1 | 0.706 | -0.328 | -9.801 |
| N2 | -3.361 | -1.223 | -0.673 |
| N3 | -4.400 | -1.179 | -0.064 |
| H4 | -5.014 | -0.350 | -0.221 |

FeMoco, N2H on lower Fe (as in Fig. 7b)

| FE1 | -0.988 | -0.434 | -4.627 |
| --- | --- | --- | --- |
| FE2 | 0.373 | 1.593 | -5.187 |
| FE3 | 1.491 | -1.032 | -5.147 |
| FE4 | 1.015 | -0.813 | -2.568 |
| FE5 | -1.858 | -0.769 | -1.914 |
| FE6 | -0.075 | 1.444 | -2.539 |
| MO1 | 0.000 | 0.000 | 0.000 |
| FE7 | -0.044 | -0.175 | -7.112 |
| S1 | -0.246 | -2.127 | -5.981 |
| S2 | 1.988 | 0.696 | -6.521 |
| S3 | 2.744 | -1.714 | -3.555 |
| S4 | -1.588 | 1.167 | -6.146 |
| S5 | -0.207 | -2.102 | -1.243 |
| S6 | -2.860 | -1.131 | -3.797 |
| S7 | -1.732 | 1.316 | -1.038 |
| S8 | 1.843 | 0.907 | -1.282 |
| S9 | 0.504 | 3.162 | -3.739 |
| N1 | 1.810 | -0.725 | 1.340 |
| H1 | 2.635 | -0.128 | 1.243 |
| H2 | 1.460 | -0.642 | 2.297 |
| H3 | 2.082 | -1.698 | 1.175 |
| O1 | -0.950 | -1.210 | 1.378 |
| H1 | -1.024 | -0.648 | 2.183 |
| O1 | -0.041 | 1.306 | 1.585 |
| H1 | -0.601 | 2.101 | 1.476 |
| S1 | -0.332 | -0.469 | -9.320 |
| H1 | 0.196 | 0.723 | -9.695 |
| N2 | -3.223 | -1.122 | -0.955 |
| N3 | -4.216 | -1.087 | -0.289 |
| H3 | -4.745 | -0.191 | -0.253 |
